# Supplementary material for: Systematic review of management for treatment-resistant depression in adolescents
Source: Springer Nature journal article supplement (doi:10.1186/s12888-014-0340-6), 2014-11-29
Supplement: MOESM2 [file 9747612]

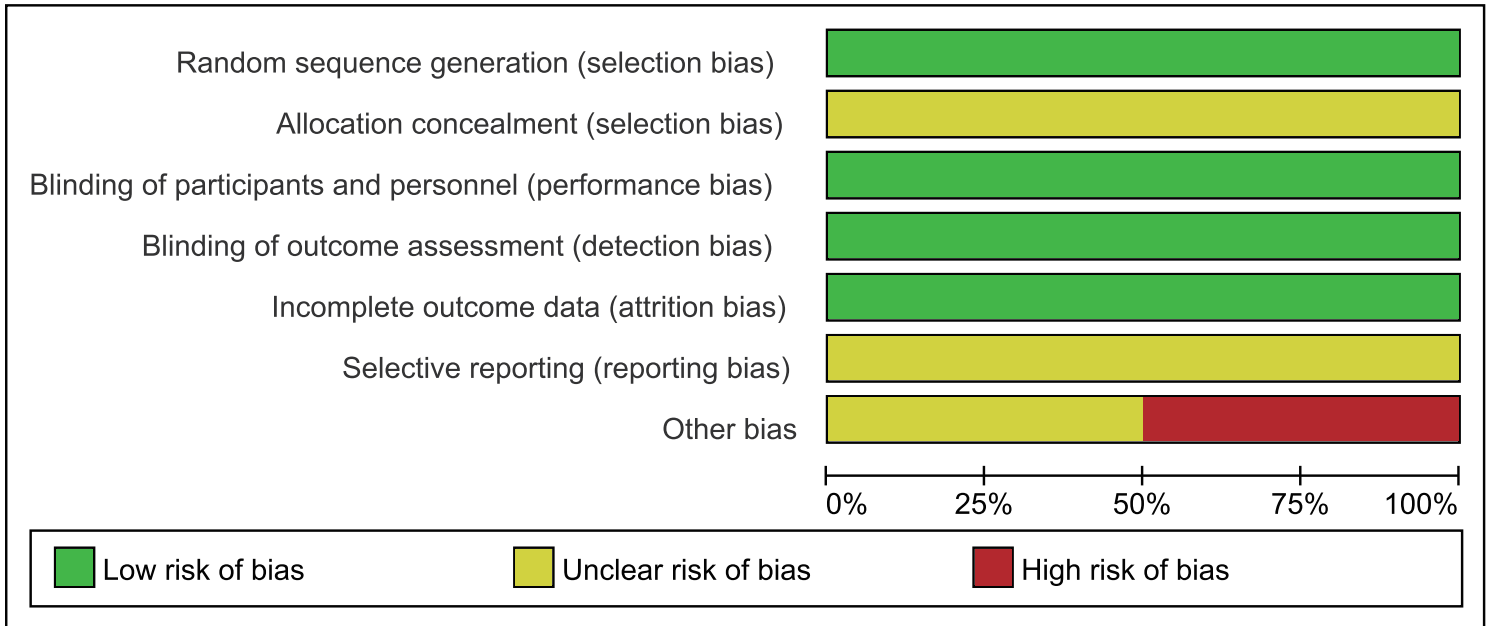

|               | Random sequence generation (selection bias) | Allocation concealment (selection bias) | Blinding of participants and personnel (performance bias) | Blinding of outcome assessment (detection bias) | Incomplete outcome data (attrition bias) | Selective reporting (reporting bias) | Other bias |
|---------------|---------------------------------------------|-----------------------------------------|-----------------------------------------------------------|-------------------------------------------------|------------------------------------------|--------------------------------------|------------|
| Birmaher-1998 | +                                           | ?                                       | +                                                         | +                                               | +                                        | ?                                    | ?          |
| Brent-2008    | +                                           | ?                                       | +                                                         | +                                               | +                                        | ?                                    | -          |
