# Supplementary material for: Systematic review of management for treatment-resistant depression in adolescents
Source: Springer Nature journal article supplement (doi:10.1186/s12888-014-0340-6), 2014-11-29

A

### Proportion meta-analysis plot [random effects]

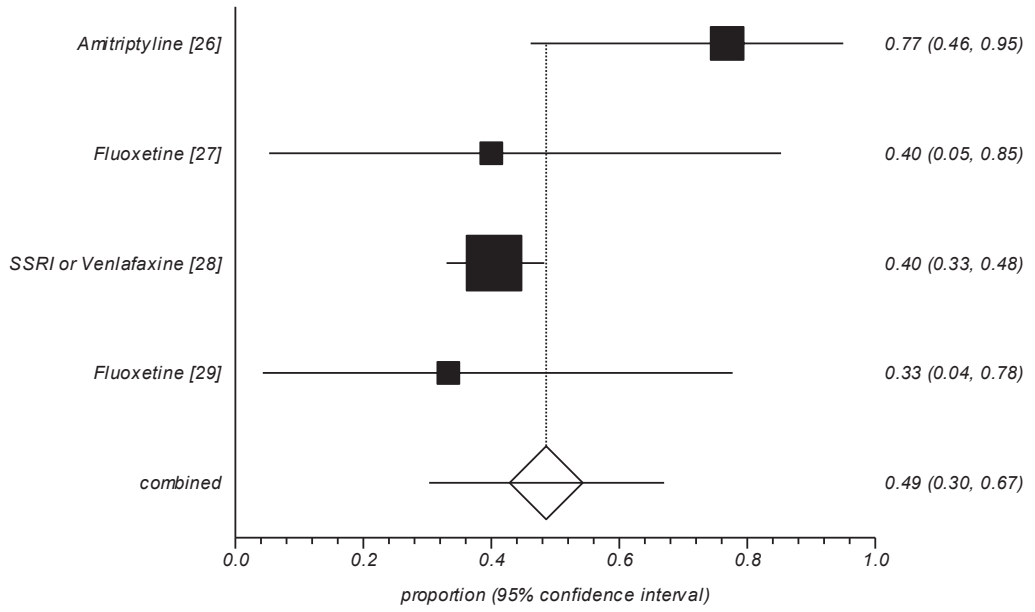

B

### Proportion meta-analysis plot [random effects]

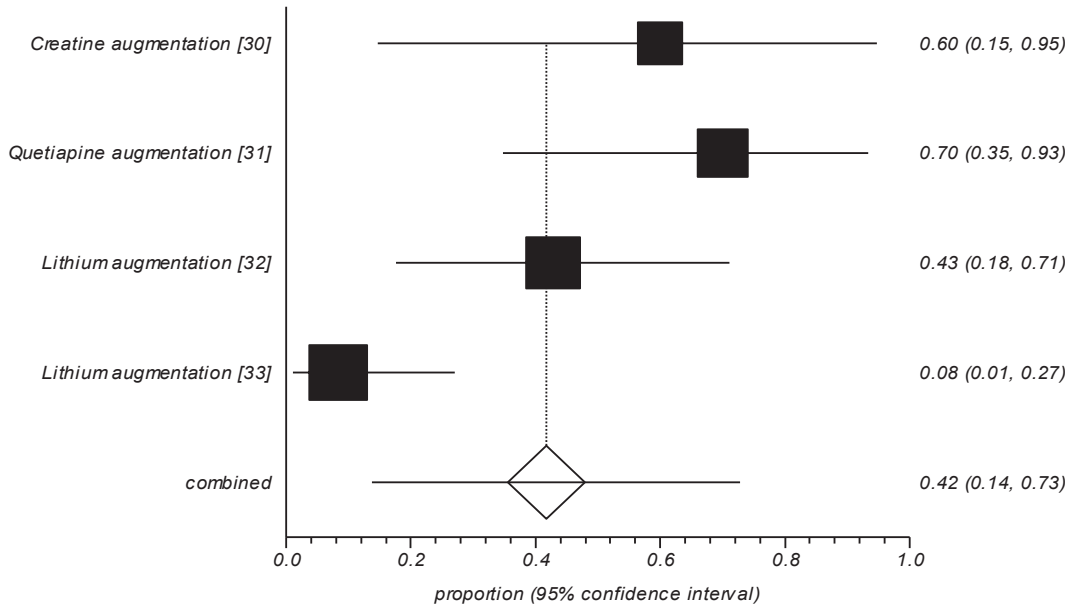

Supplement: MOESM6 [file 9747612]
